# Supplementary material for: Universal human papillomavirus typing by whole genome sequencing following target enrichment: evaluation of assay reproducibility and limit of detection
Source: PubMed Central journal article supplement (PMC6425667; doi:10.1186/s12864-019-5598-0), 2019-03-20

**Additional file 1**, Supplementary Figure 1. Overall quality of reads from 4 replicates. (A) Mean number of reads passing the default filtering of Illumina BCL2fasq V1.8.4. (B) Mean base quality score. (C) Percentage of base with quality score  $\geq 30$ . Y-axis indicates the mean of values of 4 replicates. Error bars represent standard deviation of 4 replicates (PDF).

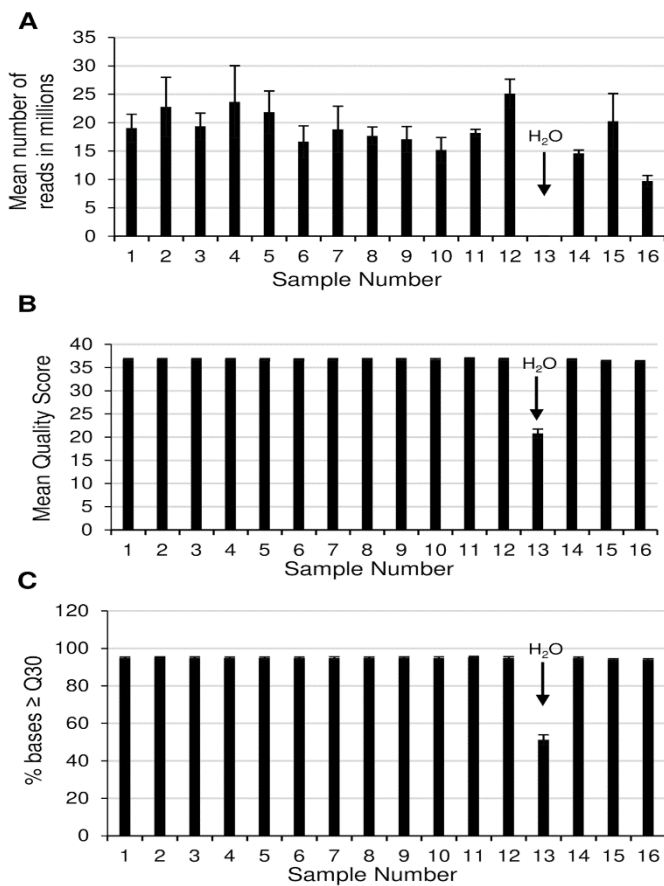

Supplement: 12864_2019_5598_MOESM1_ESM.pdf [file 12864_2019_5598_MOESM1_ESM.pdf]
