# Supplementary material for: Universal human papillomavirus typing by whole genome sequencing following target enrichment: evaluation of assay reproducibility and limit of detection
Source: PubMed Central journal article supplement (PMC6425667; doi:10.1186/s12864-019-5598-0), 2019-03-20

**Additional file 2**, Supplementary Figure 2. Reproducibility for eWGS for internal control *HBB*. Data shown is mean  $\pm$  SD of 4 replicates/sample for number of reads (A), average depth of coverage (B), and fraction of reference covered (C). Error bars represent standard deviations (PDF).

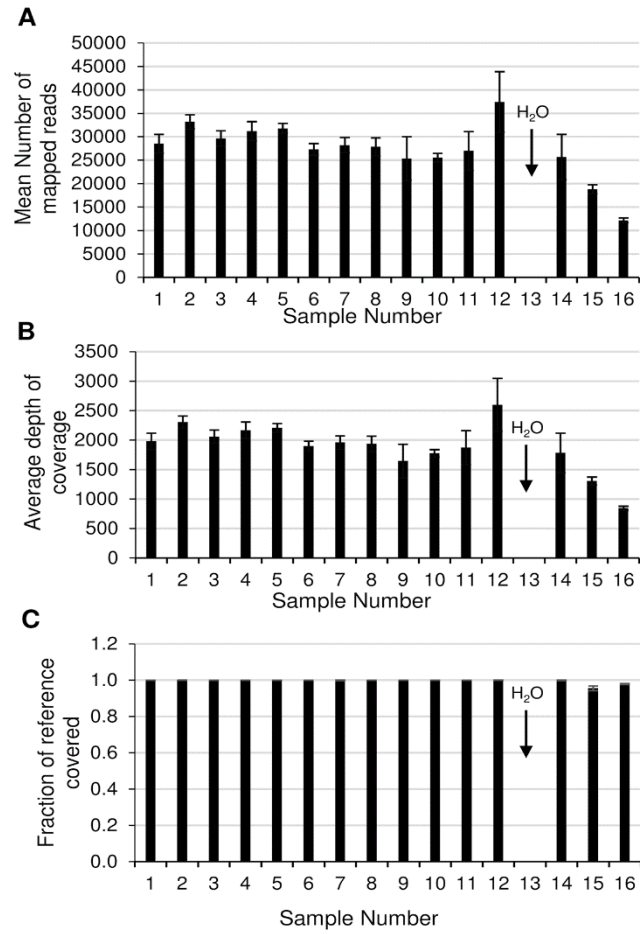

Supplement: 12864_2019_5598_MOESM2_ESM.pdf [file 12864_2019_5598_MOESM2_ESM.pdf]
